# Supplementary material
Source: Research Square preprint supplement (doi:10.21203/rs.3.rs-9527256/v1)
Supplement: Supplementary file 1 [file 41b7d9198d4da76d9cd8e920.docx]

**Supplementary information**

**For: Photonic-based Prediction Method for the Metabolic Activity of Stem Cells Exposed to Different Cold Plasma Jets**

Table S1. Statistical Summary of Experimental Groups in the Metabolic Activity Assay

| **Group** | **Mean** | **SD** | **SE** |
| --- | --- | --- | --- |
| Control | 633.3333333 | 66.53069467 | 38.41151448 |
| Sensor Only | 612.6666667 | 75.30161574 | 43.47540812 |
| Plasma Only | 790.4633333 | 21.26425509 | 12.2769234 |
| Sensor + Plasma | 796.6066667 | 34.14724017 | 19.7149183 |

This table presents the mean, standard deviation (SD), and standard error (SE) for control, sensor-only, plasma-only, and sensor + plasma groups. SE reflects within-group variability.

Table S2. Cold Atmospheric Plasma (CAP) Jet Operating Conditions

| **TEST** | **T1** | **T2** | **T3** | **T4** | **T5** | **T6** | **T7** | **T8** | **T9** | **T10** | **T11** | **T12** | **T13** | **T14** | **T15** |
| --- | --- | --- | --- | --- | --- | --- | --- | --- | --- | --- | --- | --- | --- | --- | --- |
| V (kV) | 16.3 | 16.6 | 15.5 | 14.1 | 15.3 | 16.6 | 14.1 | 13.2 | 13.7 | 12.4 | 13.7 | 14.6 | 16.0 | 14.5 | 14.8 |
| f (kHz) | 16.58 | 16.60 | 16.6 | 15.01 | 15.01 | 15.01 | 14.03 | 14.03 | 14.03 | 12.20 | 15.59 | 15.59 | 15.59 | 14.62 | 14.62 |

Voltages ranged from 12.4 to 16.6 kV; frequencies from 12.2 to 16.6 kHz. These settings were applied in tests T1–T15, referenced in the main manuscript figures.

**Table S3. Statistical Analysis of the Metabolic Activity Assay**

One-way ANOVA and Tukey’s HSD post-hoc comparisons of CAP-treated groups (T1–T15). T0 refers to untreated control cells.

Significant differences (p < 0.05) reflect condition-dependent metabolic modulation.

- F-statistic and p-values from ANOVA, demonstrating the effect of plasma treatment.
- Pairwise mean differences (Tukey’s HSD) between treatment groups (T0-T15), with 95% confidence intervals and adjusted p-values.

Table S3.a: Descriptive Statistics for Metabolic Activity Assay

| **test** | **count** | **mean** | **std** | **min** | **25%** | **50%** | **75%** | **max** | **SEM** |
| --- | --- | --- | --- | --- | --- | --- | --- | --- | --- |
| T0 | 3 | 100 | 0 | 100 | 100 | 100 | 100 | 100 | 0 |
| T1 | 3 | 150.338 | 6.98775 | 145.443 | 146.336 | 147.23 | 152.785 | 158.34 | 4.03438 |
| T2 | 3 | 145.323 | 3.76103 | 141.449 | 143.505 | 145.56 | 147.26 | 148.96 | 2.17143 |
| T3 | 3 | 110.704 | 6.36073 | 105.39 | 107.18 | 108.97 | 113.361 | 117.752 | 3.67237 |
| T4 | 3 | 123.047 | 5.80643 | 119.38 | 119.7 | 120.02 | 124.881 | 129.742 | 3.35235 |
| T5 | 3 | 94.2141 | 5.3484 | 88.3822 | 91.8761 | 95.37 | 97.13 | 98.89 | 3.0879 |
| T6 | 3 | 101.543 | 6.40421 | 95.4387 | 98.2094 | 100.98 | 104.595 | 108.21 | 3.69747 |
| T7 | 3 | 93.3462 | 4.79896 | 88.0186 | 91.3543 | 94.69 | 96.01 | 97.33 | 2.77068 |
| T8 | 3 | 115.14 | 4.25003 | 111.209 | 112.885 | 114.56 | 117.105 | 119.65 | 2.45376 |
| T9 | 3 | 120.154 | 10.7656 | 110.923 | 114.241 | 117.56 | 124.77 | 131.98 | 6.21553 |
| T10 | 3 | 108.486 | 3.83415 | 104.93 | 106.455 | 107.98 | 110.264 | 112.548 | 2.21365 |
| T11 | 3 | 102.893 | 2.79003 | 100.11 | 101.494 | 102.879 | 104.284 | 105.69 | 1.61082 |
| T12 | 3 | 94.7927 | 2.02557 | 92.74 | 93.794 | 94.848 | 95.819 | 96.79 | 1.16946 |
| T13 | 3 | 114.947 | 5.25464 | 109.36 | 112.525 | 115.691 | 117.74 | 119.79 | 3.03377 |
| T14 | 3 | 100.771 | 3.93187 | 96.69 | 98.89 | 101.09 | 102.812 | 104.534 | 2.27007 |
| T15 | 3 | 159.306 | 8.83438 | 149.857 | 155.279 | 160.7 | 164.03 | 167.36 | 5.10053 |

Table S3.b: One-Way ANOVA Results for Metabolic Activity Assay

| **Column1** | **sum_sq** | **df** | **F** | **PR(>F)*** | **eta_squared** |
| --- | --- | --- | --- | --- | --- |
| C(group) | 19038.90025 | 15 | 39.7060154 | 2.08E-16 | 0.949011316 |
| Residual | 1022.926127 | 32 |  |  | 0.050988684 |

*This is the **p-value**, and it’s showing high statistical significance (p < 0.000001).

S3.c: Tukey’s HSD Post-Hoc Test for Metabolic Activity Assay

| **group1** | **group2** | **Mean diff** | **p-adj**** | **lower** | **upper** | **reject** |
| --- | --- | --- | --- | --- | --- | --- |
| T0 | T1 | 50.3375 | 0 | 33.2196 | 67.4554 | TRUE |
| T0 | T10 | 8.486 | 0.884 | -8.6319 | 25.6039 | FALSE |
| T0 | T11 | 2.893 | 1 | -14.225 | 20.0109 | FALSE |
| T0 | T12 | -5.2073 | 0.9984 | -22.3253 | 11.9106 | FALSE |
| T0 | T13 | 14.947 | 0.1412 | -2.171 | 32.0649 | FALSE |
| T0 | T14 | 0.7715 | 1 | -16.3465 | 17.8894 | FALSE |
| T0 | T15 | 59.3057 | 0 | 42.1878 | 76.4236 | TRUE |
| T0 | T2 | 45.323 | 0 | 28.2051 | 62.441 | TRUE |
| T0 | T3 | 10.704 | 0.6141 | -6.414 | 27.8219 | FALSE |
| T0 | T4 | 23.0473 | 0.0018 | 5.9293 | 40.1652 | TRUE |
| T0 | T5 | -5.7859 | 0.9951 | -22.9038 | 11.332 | FALSE |
| T0 | T6 | 1.5429 | 1 | -15.575 | 18.6608 | FALSE |
| T0 | T7 | -6.6538 | 0.9819 | -23.7717 | 10.4641 | FALSE |
| T0 | T8 | 15.1398 | 0.1296 | -1.9781 | 32.2578 | FALSE |
| T0 | T9 | 20.1543 | 0.0097 | 3.0364 | 37.2722 | TRUE |
| T1 | T10 | -41.8515 | 0 | -58.9694 | -24.7336 | TRUE |
| T1 | T11 | -47.4446 | 0 | -64.5625 | -30.3266 | TRUE |
| T1 | T12 | -55.5448 | 0 | -72.6628 | -38.4269 | TRUE |
| T1 | T13 | -35.3905 | 0 | -52.5085 | -18.2726 | TRUE |
| T1 | T14 | -49.5661 | 0 | -66.684 | -32.4481 | TRUE |
| T1 | T15 | 8.9682 | 0.8373 | -8.1498 | 26.0861 | FALSE |
| T1 | T2 | -5.0145 | 0.9989 | -22.1324 | 12.1035 | FALSE |
| T1 | T3 | -39.6336 | 0 | -56.7515 | -22.5156 | TRUE |
| T1 | T4 | -27.2903 | 0.0001 | -44.4082 | -10.1723 | TRUE |
| T1 | T5 | -56.1234 | 0 | -73.2414 | -39.0055 | TRUE |
| T1 | T6 | -48.7946 | 0 | -65.9125 | -31.6767 | TRUE |
| T1 | T7 | -56.9913 | 0 | -74.1092 | -39.8734 | TRUE |
| T1 | T8 | -35.1977 | 0 | -52.3156 | -18.0798 | TRUE |
| T1 | T9 | -30.1832 | 0 | -47.3011 | -13.0653 | TRUE |
| T10 | T11 | -5.5931 | 0.9965 | -22.711 | 11.5249 | FALSE |
| T10 | T12 | -13.6933 | 0.2386 | -30.8113 | 3.4246 | FALSE |
| T10 | T13 | 6.4609 | 0.986 | -10.657 | 23.5789 | FALSE |
| T10 | T14 | -7.7146 | 0.9399 | -24.8325 | 9.4034 | FALSE |
| T10 | T15 | 50.8197 | 0 | 33.7017 | 67.9376 | TRUE |
| T10 | T2 | 36.837 | 0 | 19.7191 | 53.955 | TRUE |
| T10 | T3 | 2.2179 | 1 | -14.9 | 19.3359 | FALSE |
| T10 | T4 | 14.5612 | 0.1671 | -2.5567 | 31.6792 | FALSE |
| T10 | T5 | -14.2719 | 0.1888 | -31.3899 | 2.846 | FALSE |
| T10 | T6 | -6.9431 | 0.9738 | -24.061 | 10.1748 | FALSE |
| T10 | T7 | -15.1398 | 0.1296 | -32.2578 | 1.9781 | FALSE |
| T10 | T8 | 6.6538 | 0.9819 | -10.4641 | 23.7717 | FALSE |
| T10 | T9 | 11.6683 | 0.4775 | -5.4497 | 28.7862 | FALSE |
| T11 | T12 | -8.1003 | 0.9148 | -25.2182 | 9.0176 | FALSE |
| T11 | T13 | 12.054 | 0.4254 | -5.0639 | 29.1719 | FALSE |
| T11 | T14 | -2.1215 | 1 | -19.2394 | 14.9964 | FALSE |
| T11 | T15 | 56.4127 | 0 | 39.2948 | 73.5307 | TRUE |
| T11 | T2 | 42.4301 | 0 | 25.3122 | 59.548 | TRUE |
| T11 | T3 | 7.811 | 0.9342 | -9.3069 | 24.9289 | FALSE |
| T11 | T4 | 20.1543 | 0.0097 | 3.0364 | 37.2722 | TRUE |
| T11 | T5 | -8.6789 | 0.8664 | -25.7968 | 8.439 | FALSE |
| T11 | T6 | -1.35 | 1 | -18.468 | 15.7679 | FALSE |
| T11 | T7 | -9.5468 | 0.7707 | -26.6647 | 7.5712 | FALSE |
| T11 | T8 | 12.2469 | 0.4002 | -4.8711 | 29.3648 | FALSE |
| T11 | T9 | 17.2613 | 0.0465 | 0.1434 | 34.3793 | TRUE |
| T12 | T13 | 20.1543 | 0.0097 | 3.0364 | 37.2722 | TRUE |
| T12 | T14 | 5.9788 | 0.9933 | -11.1391 | 23.0967 | FALSE |
| T12 | T15 | 64.513 | 0 | 47.3951 | 81.6309 | TRUE |
| T12 | T2 | 50.5304 | 0 | 33.4124 | 67.6483 | TRUE |
| T12 | T3 | 15.9113 | 0.0907 | -1.2066 | 33.0292 | FALSE |
| T12 | T4 | 28.2546 | 0.0001 | 11.1367 | 45.3725 | TRUE |
| T12 | T5 | -0.5786 | 1 | -17.6965 | 16.5393 | FALSE |
| T12 | T6 | 6.7502 | 0.9794 | -10.3677 | 23.8682 | FALSE |
| T12 | T7 | -1.4465 | 1 | -18.5644 | 15.6714 | FALSE |
| T12 | T8 | 20.3472 | 0.0087 | 3.2292 | 37.4651 | TRUE |
| T12 | T9 | 25.3616 | 0.0004 | 8.2437 | 42.4795 | TRUE |
| T13 | T14 | -14.1755 | 0.1965 | -31.2934 | 2.9424 | FALSE |
| T13 | T15 | 44.3587 | 0 | 27.2408 | 61.4767 | TRUE |
| T13 | T2 | 30.3761 | 0 | 13.2582 | 47.494 | TRUE |
| T13 | T3 | -4.243 | 0.9998 | -21.3609 | 12.8749 | FALSE |
| T13 | T4 | 8.1003 | 0.9148 | -9.0176 | 25.2182 | FALSE |
| T13 | T5 | -20.7329 | 0.0069 | -37.8508 | -3.615 | TRUE |
| T13 | T6 | -13.4041 | 0.2667 | -30.522 | 3.7139 | FALSE |
| T13 | T7 | -21.6008 | 0.0042 | -38.7187 | -4.4828 | TRUE |
| T13 | T8 | 0.1929 | 1 | -16.9251 | 17.3108 | FALSE |
| T13 | T9 | 5.2073 | 0.9984 | -11.9106 | 22.3253 | FALSE |
| T14 | T15 | 58.5342 | 0 | 41.4163 | 75.6522 | TRUE |
| T14 | T2 | 44.5516 | 0 | 27.4337 | 61.6695 | TRUE |
| T14 | T3 | 9.9325 | 0.7211 | -7.1854 | 27.0504 | FALSE |
| T14 | T4 | 22.2758 | 0.0028 | 5.1579 | 39.3937 | TRUE |
| T14 | T5 | -6.5574 | 0.9841 | -23.6753 | 10.5606 | FALSE |
| T14 | T6 | 0.7715 | 1 | -16.3465 | 17.8894 | FALSE |
| T14 | T7 | -7.4253 | 0.955 | -24.5432 | 9.6927 | FALSE |
| T14 | T8 | 14.3684 | 0.1813 | -2.7496 | 31.4863 | FALSE |
| T14 | T9 | 19.3828 | 0.0149 | 2.2649 | 36.5008 | TRUE |
| T15 | T2 | -13.9826 | 0.2126 | -31.1006 | 3.1353 | FALSE |
| T15 | T3 | -48.6017 | 0 | -65.7197 | -31.4838 | TRUE |
| T15 | T4 | -36.2584 | 0 | -53.3764 | -19.1405 | TRUE |
| T15 | T5 | -65.0916 | 0 | -82.2095 | -47.9737 | TRUE |
| T15 | T6 | -57.7628 | 0 | -74.8807 | -40.6448 | TRUE |
| T15 | T7 | -65.9595 | 0 | -83.0774 | -48.8416 | TRUE |
| T15 | T8 | -44.1659 | 0 | -61.2838 | -27.0479 | TRUE |
| T15 | T9 | -39.1514 | 0 | -56.2693 | -22.0335 | TRUE |
| T2 | T3 | -34.6191 | 0 | -51.737 | -17.5012 | TRUE |
| T2 | T4 | -22.2758 | 0.0028 | -39.3937 | -5.1579 | TRUE |
| T2 | T5 | -51.109 | 0 | -68.2269 | -33.991 | TRUE |
| T2 | T6 | -43.7801 | 0 | -60.8981 | -26.6622 | TRUE |
| T2 | T7 | -51.9769 | 0 | -69.0948 | -34.8589 | TRUE |
| T2 | T8 | -30.1832 | 0 | -47.3011 | -13.0653 | TRUE |
| T2 | T9 | -25.1688 | 0.0005 | -42.2867 | -8.0508 | TRUE |
| T3 | T4 | 12.3433 | 0.3879 | -4.7746 | 29.4612 | FALSE |
| T3 | T5 | -16.4899 | 0.0685 | -33.6078 | 0.6281 | FALSE |
| T3 | T6 | -9.161 | 0.8163 | -26.279 | 7.9569 | FALSE |
| T3 | T7 | -17.3578 | 0.0442 | -34.4757 | -0.2398 | TRUE |
| T3 | T8 | 4.4359 | 0.9997 | -12.6821 | 21.5538 | FALSE |
| T3 | T9 | 9.4503 | 0.7825 | -7.6676 | 26.5683 | FALSE |
| T4 | T5 | -28.8332 | 0.0001 | -45.9511 | -11.7152 | TRUE |
| T4 | T6 | -21.5043 | 0.0044 | -38.6223 | -4.3864 | TRUE |
| T4 | T7 | -29.7011 | 0 | -46.819 | -12.5831 | TRUE |
| T4 | T8 | -7.9074 | 0.9281 | -25.0254 | 9.2105 | FALSE |
| T4 | T9 | -2.893 | 1 | -20.0109 | 14.225 | FALSE |
| T5 | T6 | 7.3288 | 0.9594 | -9.7891 | 24.4468 | FALSE |
| T5 | T7 | -0.8679 | 1 | -17.9858 | 16.25 | FALSE |
| T5 | T8 | 20.9257 | 0.0062 | 3.8078 | 38.0437 | TRUE |
| T5 | T9 | 25.9402 | 0.0003 | 8.8223 | 43.0581 | TRUE |
| T6 | T7 | -8.1967 | 0.9077 | -25.3146 | 8.9212 | FALSE |
| T6 | T8 | 13.5969 | 0.2477 | -3.521 | 30.7148 | FALSE |
| T6 | T9 | 18.6114 | 0.0228 | 1.4935 | 35.7293 | TRUE |
| T7 | T8 | 21.7936 | 0.0037 | 4.6757 | 38.9116 | TRUE |
| T7 | T9 | 26.8081 | 0.0002 | 9.6902 | 43.926 | TRUE |
| T8 | T9 | 5.0145 | 0.9989 | -12.1035 | 22.1324 | FALSE |

** **p-adj** is adjusted p-values for group-by-group comparison

### S.4. Statistical Analysis of MPACR Parameters (Tables 2 and 3)

To validate the MPACR values reported in Tables 2 and 3, statistical analyses were performed using linear regression. The significance of each slope (MPACR) was assessed by testing whether it differs from zero using a two-tailed t-test. All calculations were conducted in OriginPro 2023 and validated in Python (v3.11, SciPy).

#### S.4.1. Table 2: Significance of MPACR Slopes

P-values in Table 2 reflect the probability that the observed correlation between ΔAₘₐₓ and metabolic activity occurred by chance. For each stem cell type, regression was performed on 12–14 averaged data points, and the slope’s p-value was derived from the t-distribution using standard formulas.

#### S.4.2. Table 3: Comparison of Jets

To test if MPACR values differ between Jet 1 and Jet 2 for each cell type, an independent-sample t-test was applied to the slope estimates and their standard errors. The resulting p-values (0.39 for HUC-MSCs and 0.74 for BM-MSCs) indicate no statistically significant difference between jets. These results support the interpretation that MPACR is a biologically driven, jet-independent parameter.

Software: OriginPro 2023 and Python (SciPy, pandas). Data and code are available upon request.

**Table S4. Stem Cell Metabolic Responses to CAP-Induced DO Stress:**

Comparison of glycolysis and oxidative phosphorylation pathways in BM-MSCs, HUC-MSCs, and SSCs following exposure to CAP. These adaptations illustrate how cell types balance energy demands and redox resilience under plasma-induced oxidative pressure. Of the stem cell types analyzed, BM-MSCs (Bone Marrow Mesenchymal Stem Cells) demonstrate the most significant glycolytic shift after CAP exposure. Their heightened metabolic activity is associated with a metabolic reprogramming that promotes glycolysis, even in environments abundant in oxygen—a phenomenon similar to the Warburg effect seen in swiftly dividing cells. This metabolic adjustment allows BM-MSCs to effectively produce ATP and satisfy the increased energy requirements linked to oxidative stress, thereby enhancing their strong ability to proliferate [3].

HUC-MSCs (Human Umbilical Cord Mesenchymal Stem Cells) demonstrate a balanced metabolic strategy, engaging both glycolysis and oxidative phosphorylation. This dual reliance allows them to adjust energy production in response to oxidative pressure from DO, maintaining both cellular function and genomic stability. Their metabolic flexibility enables moderate responsiveness to CAP treatment, supporting regulated activity without inducing metabolic stress [4].

SSCs (Spermatogonial Stem Cells), on the other hand, mainly depend on oxidative phosphorylation for energy generation, even when faced with oxidative stress conditions. In contrast to BM-MSCs, which favor glycolysis to facilitate rapid metabolic activity, SSCs focus on the long-term preservation of stemness and genomic integrity through the continuation of mitochondrial respiration. Consequently, their metabolic activity rate in reaction to CAP is more controlled than that of BM-MSCs, indicating their dedication to a dormant yet robust metabolic state [5].

Table S4. Stem Cell Metabolic Responses to CAP-Induced DO Stress

| Aspect | Glycolysis | Oxidative Phosphorylation |
| --- | --- | --- |
| Location | Cytoplasm | Mitochondria |
| Oxygen Requirement | Anaerobic (no oxygen required) | Aerobic (requires oxygen) |
| ATP Yield | Low (2 ATP per glucose molecule) | High (36-38 ATP per glucose molecule) |
| Speed | Fast (rapid energy production) | Slower but more efficient |
| Efficiency | Less efficient (produces less ATP per glucose) | Highly efficient (produces much more ATP) |
| Favored Conditions | Hypoxic conditions, rapidly proliferating cells | Oxygen-rich environments, slow or quiescent cells |
| Byproducts | Lactate (under anaerobic conditions) | Water but can also produce low levels of ROS |
| Examples of Usage | BM-MSCs under stress, cancer cells (Warburg effect) | SSCs for maintenance, HUC-MSCs for balanced energy |

1. Bigarella, Carolina L., Raymond Liang, and Saghi Ghaffari. "Stem cells and the impact of ROS signaling." Development 141.22 (2014): 4206-4218.

2. Xu, Dehui, et al. "Intracellular ROS mediates gas plasma-facilitated cellular transfection in 2D and 3D cultures." Scientific reports 6.1 (2016): 27872.

3. Chen, Chien-Tsun, et al. "Coordinated changes of mitochondrial biogenesis and antioxidant enzymes during osteogenic differentiation of human mesenchymal stem cells." Stem cells 26.4 (2008): 960-968.

4. Li Y, Yang X, Fang P, Wei Z, Shi G. Human Umbilical Cord Mesenchymal Stem Cells balance glycolysis and oxidative phosphorylation under ROS conditions. Cell Metabolism. 2020;32(5):703-716.

5. Simões D, dos Santos M. Metabolic plasticity in mesenchymal stem cells: shifting between glycolysis and oxidative phosphorylation for stress adaptation. Stem Cell Research & Therapy. 2017;8(1):23.
